# Supplementary material
Source: PubMed Central journal article supplement (PMC5939954)
Supplement: NIHMS929846-supplement-Supp_info.pdf [file NIHMS929846-supplement-Supp_info.pdf]

## SUPPLEMENTARY MATERIAL

### CHARMM-GUI Martini Maker for Modeling and Simulation of Complex Bacterial Membranes with Lipopolysaccharides

Pin-Chia Hsu<sup>1†</sup>, Bart M. H. Bruininks<sup>2†</sup>, Damien Jefferies<sup>1†</sup>, Paulo Cesar Telles de Souza<sup>2†</sup>, Jumin Lee<sup>3†</sup>, Dhillon S. Patel<sup>3</sup>, Siewert J. Marrink<sup>2</sup>, Yifei Qi<sup>4\*</sup>, Syma Khalid<sup>1\*</sup>, and Wonpil Im<sup>3\*</sup>

<sup>†</sup>These authors contributed equally to this work.

<sup>1</sup>*School of Chemistry, University of Southampton, Southampton, SO17 1BJ, UK*

<sup>2</sup>*Groningen Biomolecular Sciences and Biotechnology Institute and Zernike Institute for Advanced Materials, University of Groningen, Nijenborgh 7, 9747 AG Groningen, The Netherlands*

<sup>3</sup>*Department of Biological Sciences and Bioengineering Program, Lehigh University, PA, USA*

<sup>4</sup>*College of Chemistry and Molecular Engineering, East China Normal University, Shanghai, 200062, China*

\*Correspondence: Yifei Qi  
Email: yfqi@chem.ecnu.edu.cn

Syma Khalid  
E-mail: S.Khalid@soton.ac.uk

Wonpil Im  
E-mail: wonpil@lehigh.edu

**Table S1.** The composition of the bilayer systems.

| Systems | Protein | Lipid types (# Lipids) |                                | Ion types (# Ions) |                 |                  | # Water | System size (xyz; Å) | Simulation time ( $\mu$ s) |
|---------|---------|------------------------|--------------------------------|--------------------|-----------------|------------------|---------|----------------------|----------------------------|
|         |         | Outer                  | Inner                          | Na <sup>+</sup>    | Cl <sup>-</sup> | Ca <sup>2+</sup> |         |                      |                            |
| OM-only | –       | 56 RaLPS               | 144 POPE<br>8 POPG<br>8 CDL2   | 395                | 35              | 112              | 4390    | 100,100,100          | 9                          |
| OM-OmpA | OmpA    | 56 RaLPS               | 144 POPE<br>8 POPG<br>8 CDL2   | 390                | 29              | 112              | 4585    | 100,100,100          | 5                          |
| OM-OmpF | OmpF    | 102 Ra LPS             | 270 POPE<br>15 POPG<br>15 CDL2 | 753                | 60              | 204              | 9455    | 150,150,100          | 5.5                        |

**Table S2.** The composition of the nanodisc systems.

| Systems      | Protein | Lipid types (# Lipids) | Ion types (# Ions) |                 |                  | # Water | System size (xyz; Å) | Simulation time ( $\mu$ s) |
|--------------|---------|------------------------|--------------------|-----------------|------------------|---------|----------------------|----------------------------|
|              |         | Outer / Innter         | Na <sup>+</sup>    | Cl <sup>-</sup> | Ca <sup>2+</sup> |         |                      |                            |
| Re LPS + MSP | MSP1D1  | 37 / 37 Re LPS         | 227                | 227             | 227              | 17321   | 140, 140, 140        | 1                          |
|              | MSP1D1  | 37 / 37 Re LPS         | 681                | 227             | 0                | 17321   | 140, 140, 140        |                            |
| Ra LPS + MSP | MSP1D1  | 33 / 33 Ra LPS         | 297                | 297             | 335              | 22466   | 150, 150, 150        |                            |
|              | MSP1D1  | 33 / 33 Ra LPS         | 967                | 297             | 0                | 22466   | 150, 150, 150        |                            |

**Table S3.** The composition of the vesicle systems.

| Systems           | Protein | Lipid types (# Lipids) |                                   | Ion types (# Ions) |                 |                  | # Water | System size (xyz; Å) | Simulation time (μs) |
|-------------------|---------|------------------------|-----------------------------------|--------------------|-----------------|------------------|---------|----------------------|----------------------|
|                   |         | Outer                  | Inner                             | Na <sup>+</sup>    | Cl <sup>-</sup> | Ca <sup>2+</sup> |         |                      |                      |
| 150-Å Re OMV-only | –       | 2076 Re LPS            | 3006 POPE<br>167 POPG<br>167 CDL2 | 11689              | 7036            | 4152             | 627652  | 444, 444, 444        | 9                    |
| 150-Å Re OMV-OmpF | OmpF    | 2076 Re LPS            | 3006 POPE<br>167 POPG<br>167 CDL2 | 5436               | 9051            | 8304             | 623277  | 444, 444, 444        | 5                    |
| 150-Å Ra OMV-only | –       | 1844 Ra LPS            | 3006 POPE<br>167 POPG<br>167 CDL2 | 21382              | 9817            | 3688             | 831366  | 487, 487, 487        | 5.5                  |
| 100-Å Ra OMV-OmpF | OmpF    | 919 Ra LPS             | 1273 POPE<br>70 POPG<br>70 CDL2   | 2492               | 7760            | 7352             | 421440  | 387, 387, 387        | 10                   |

**Table S4.** The composition of micelle and random systems using standard (W) or polarizable (PW) water models.

| Systems          | Protein | # Lipids | Ion types (# Ions) |                 |                  | # Water  | System size (Å) | Simulation time (μs) |
|------------------|---------|----------|--------------------|-----------------|------------------|----------|-----------------|----------------------|
|                  |         |          | Na <sup>+</sup>    | Cl <sup>-</sup> | Ca <sup>2+</sup> |          |                 |                      |
| Micelle + Ra LPS | –       | 5        | 198                | 168             | 10               | 15305 W  | 124             | 10                   |
|                  | –       | 10       | 304                | 244             | 20               | 22378 W  | 141             | 10                   |
|                  | –       | 15       | 357                | 267             | 30               | 24477 W  | 145             | 10                   |
|                  | –       | 20       | 395                | 275             | 40               | 25157 W  | 147             | 10                   |
|                  | –       | 20       | 475                | 275             | –                | 25117 W  | 147             | 10                   |
|                  | –       | 20       | 421                | 301             | 40               | 27383 PW | 149             | 10                   |
|                  | OmpF    | 40       | 835                | 583             | 80               | 54062 W  | 191             | 10                   |
| Micelle + Re LPS | –       | 5        | 84                 | 74              | 10               | 6692 W   | 95              | 10                   |
|                  | –       | 10       | 124                | 104             | 20               | 9512 W   | 106             | 10                   |
|                  | –       | 15       | 135                | 105             | 30               | 9573 W   | 107             | 10                   |
|                  | –       | 20       | 162                | 122             | 40               | 11156 W  | 113             | 10                   |
| Random + Ra LPS  | –       | 5        | 278                | 248             | 10               | 22309 W  | 140             | 10                   |
|                  | –       | 10       | 308                | 248             | 20               | 21951 W  | 140             | 10                   |
|                  | –       | 15       | 338                | 248             | 30               | 21500 W  | 140             | 10                   |
|                  | –       | 20       | 368                | 248             | 40               | 21106 W  | 140             | 10                   |
|                  | –       | 20       | 448                | 248             | –                | 21066 W  | 140             | 10                   |
|                  | –       | 20       | 368                | 248             | 40               | 20993 PW | 140             | 10                   |
|                  | OmpF    | 40       | 773                | 521             | 80               | 44135 W  | 180             | 10                   |
| Random + Re LPS  | –       | 5        | 131                | 121             | 10               | 10753 W  | 110             | 10                   |
|                  | –       | 10       | 141                | 121             | 20               | 10471 W  | 110             | 10                   |
|                  | –       | 15       | 151                | 121             | 30               | 10248 W  | 110             | 10                   |
|                  | –       | 20       | 161                | 121             | 40               | 9869 W   | 110             | 10                   |

**Table S5.** The average and standard error of mean (SEM) of the APL and bilayer thickness over the last microsecond of the 5- $\mu$ s *Bilayer Builder* production runs. Even though the SEM is pretty low for all systems and lipids, the insertion of a protein causes a systematic error in the Voronoi procedure at the protein lipid interphase.

| <b>OM-only</b> | <b>Parameter</b> | <b>RAMP (<math>\text{\AA}^2</math>)</b> | <b>POPE (<math>\text{\AA}^2</math>)</b> | <b>POPG (<math>\text{\AA}^2</math>)</b> | <b>CDL2 (<math>\text{\AA}^2</math>)</b> | <b>Bilayer Thickness (<math>\text{\AA}</math>)</b> |
|----------------|------------------|-----------------------------------------|-----------------------------------------|-----------------------------------------|-----------------------------------------|----------------------------------------------------|
|                | Mean             | 173.33                                  | 58.27                                   | 60.69                                   | 103.87                                  | 37.61                                              |
|                | SEM              | 0.22                                    | 0.31                                    | 0.11                                    | 0.53                                    | 0.15                                               |
| <b>OM-OmpA</b> | <b>Parameter</b> | <b>RAMP (<math>\text{\AA}^2</math>)</b> | <b>POPE (<math>\text{\AA}^2</math>)</b> | <b>POPG (<math>\text{\AA}^2</math>)</b> | <b>CDL2 (<math>\text{\AA}^2</math>)</b> | <b>Bilayer Thickness (<math>\text{\AA}</math>)</b> |
|                | Mean             | 170.61                                  | 57.72                                   | 59.95                                   | 103.18                                  | 37.25                                              |
|                | SEM              | 1.31                                    | 0.14                                    | 0.72                                    | 0.44                                    | 0.20                                               |
| <b>OM-OmpF</b> | <b>Parameter</b> | <b>RAMP (<math>\text{\AA}^2</math>)</b> | <b>POPE (<math>\text{\AA}^2</math>)</b> | <b>POPG (<math>\text{\AA}^2</math>)</b> | <b>CDL2 (<math>\text{\AA}^2</math>)</b> | <b>Bilayer Thickness (<math>\text{\AA}</math>)</b> |
|                | Mean             | 176.93                                  | 59.50                                   | 62.59                                   | 104.82                                  | 37.18                                              |
|                | SEM              | 0.17                                    | 0.34                                    | 0.64                                    | 2.0                                     | 0.12                                               |

**Table S6.** The average and the standard error of mean (SEM) of OMV area per lipid over the last 500 ns of total simulation time.

| <b>150-Å Re OMV-only</b> | <b>Parameter</b> | <b>REMP (Å<sup>2</sup>)</b> | <b>POPE (Å<sup>2</sup>)</b> | <b>POPG (Å<sup>2</sup>)</b> | <b>CDL2 (Å<sup>2</sup>)</b> |
|--------------------------|------------------|-----------------------------|-----------------------------|-----------------------------|-----------------------------|
|                          | Mean             | 179.2                       | 61.7                        | 63.4                        | 66.9                        |
|                          | SEM              | 0.014                       | 0.01                        | 0.012                       | 0.01                        |
| <b>150-Å Re OMV-OmpF</b> | <b>Parameter</b> | <b>REMP (Å<sup>2</sup>)</b> | <b>POPE (Å<sup>2</sup>)</b> | <b>POPG (Å<sup>2</sup>)</b> | <b>CDL2 (Å<sup>2</sup>)</b> |
|                          | Mean             | 179.4                       | 62.1                        | 64.3                        | 65.6                        |
|                          | SEM              | 0.015                       | 0.002                       | 0.021                       | 0.011                       |
| <b>150-Å Ra OMV-only</b> | <b>Parameter</b> | <b>RAMP (Å<sup>2</sup>)</b> | <b>POPE (Å<sup>2</sup>)</b> | <b>POPG (Å<sup>2</sup>)</b> | <b>CDL2 (Å<sup>2</sup>)</b> |
|                          | Mean             | 200.5                       | 60.7                        | 62.3                        | 68.7                        |
|                          | SEM              | 0.018                       | 0.001                       | 0.012                       | 0.010                       |
| <b>100-Å Ra OMV-OmpF</b> | <b>Parameter</b> | <b>RAMP (Å<sup>2</sup>)</b> | <b>POPE (Å<sup>2</sup>)</b> | <b>POPG (Å<sup>2</sup>)</b> | <b>CDL2 (Å<sup>2</sup>)</b> |
|                          | Mean             | 200.8                       | 61.1                        | 59.7                        | 66.1                        |
|                          | SEM              | 0.029                       | 0.004                       | 0.017                       | 0.016                       |

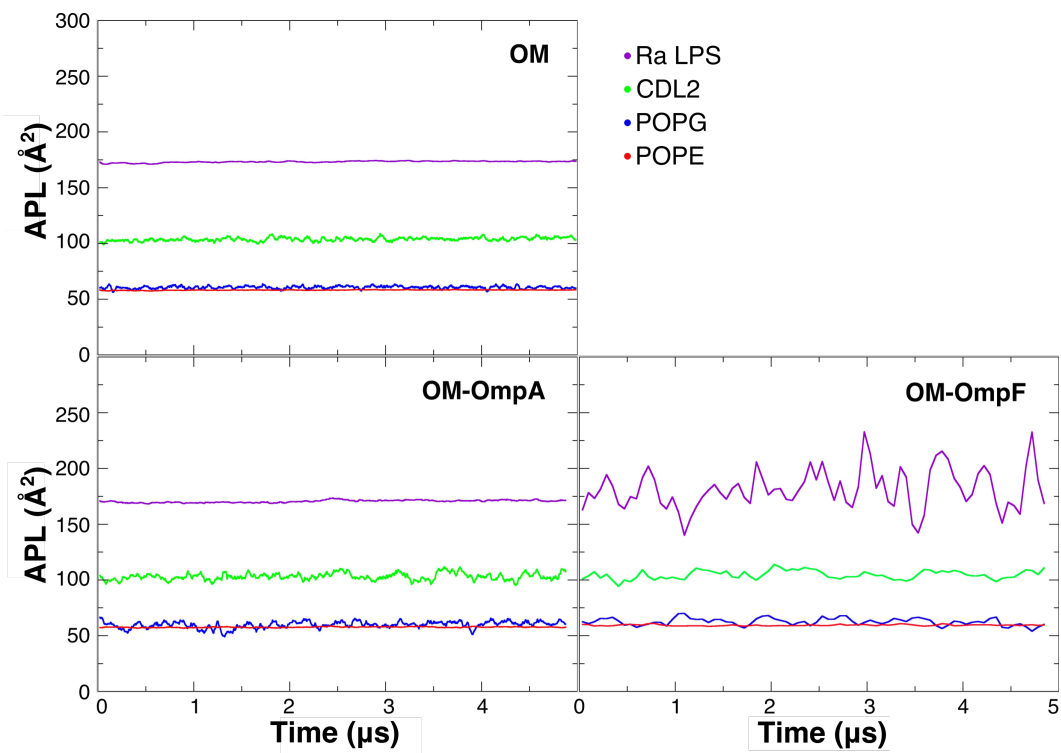

**Figure S1.** Time-series of area per lipid (APL) of the OM systems. A larger deviation is observed for OM-OmpF due to instability in the analysis program with regard to Voronoi tessellation on frames with multiple beads on the similar x,y coordinates (z is dumped). A skip of 10 was used to reduce the chance of hitting such a frame. Even in this case the average could be defined with a good certainty.



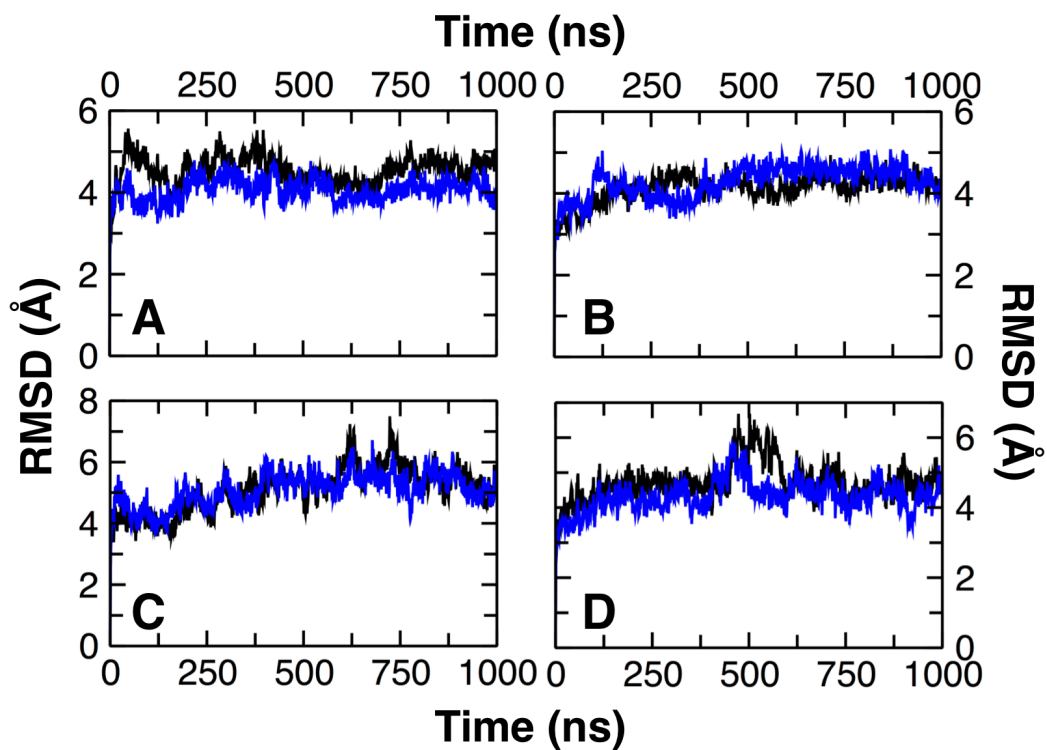

**Figure S2.** Time-series of the root-mean-square deviation (RMSD) of MSP1D1 proteins in the Ra LPS nanodiscs neutralized with (A)  $\text{Na}^+$  or (B)  $\text{Ca}^{2+}$  ions and Re LPS nanodiscs neutralized with (C)  $\text{Na}^+$  or (D)  $\text{Ca}^{2+}$  ions.

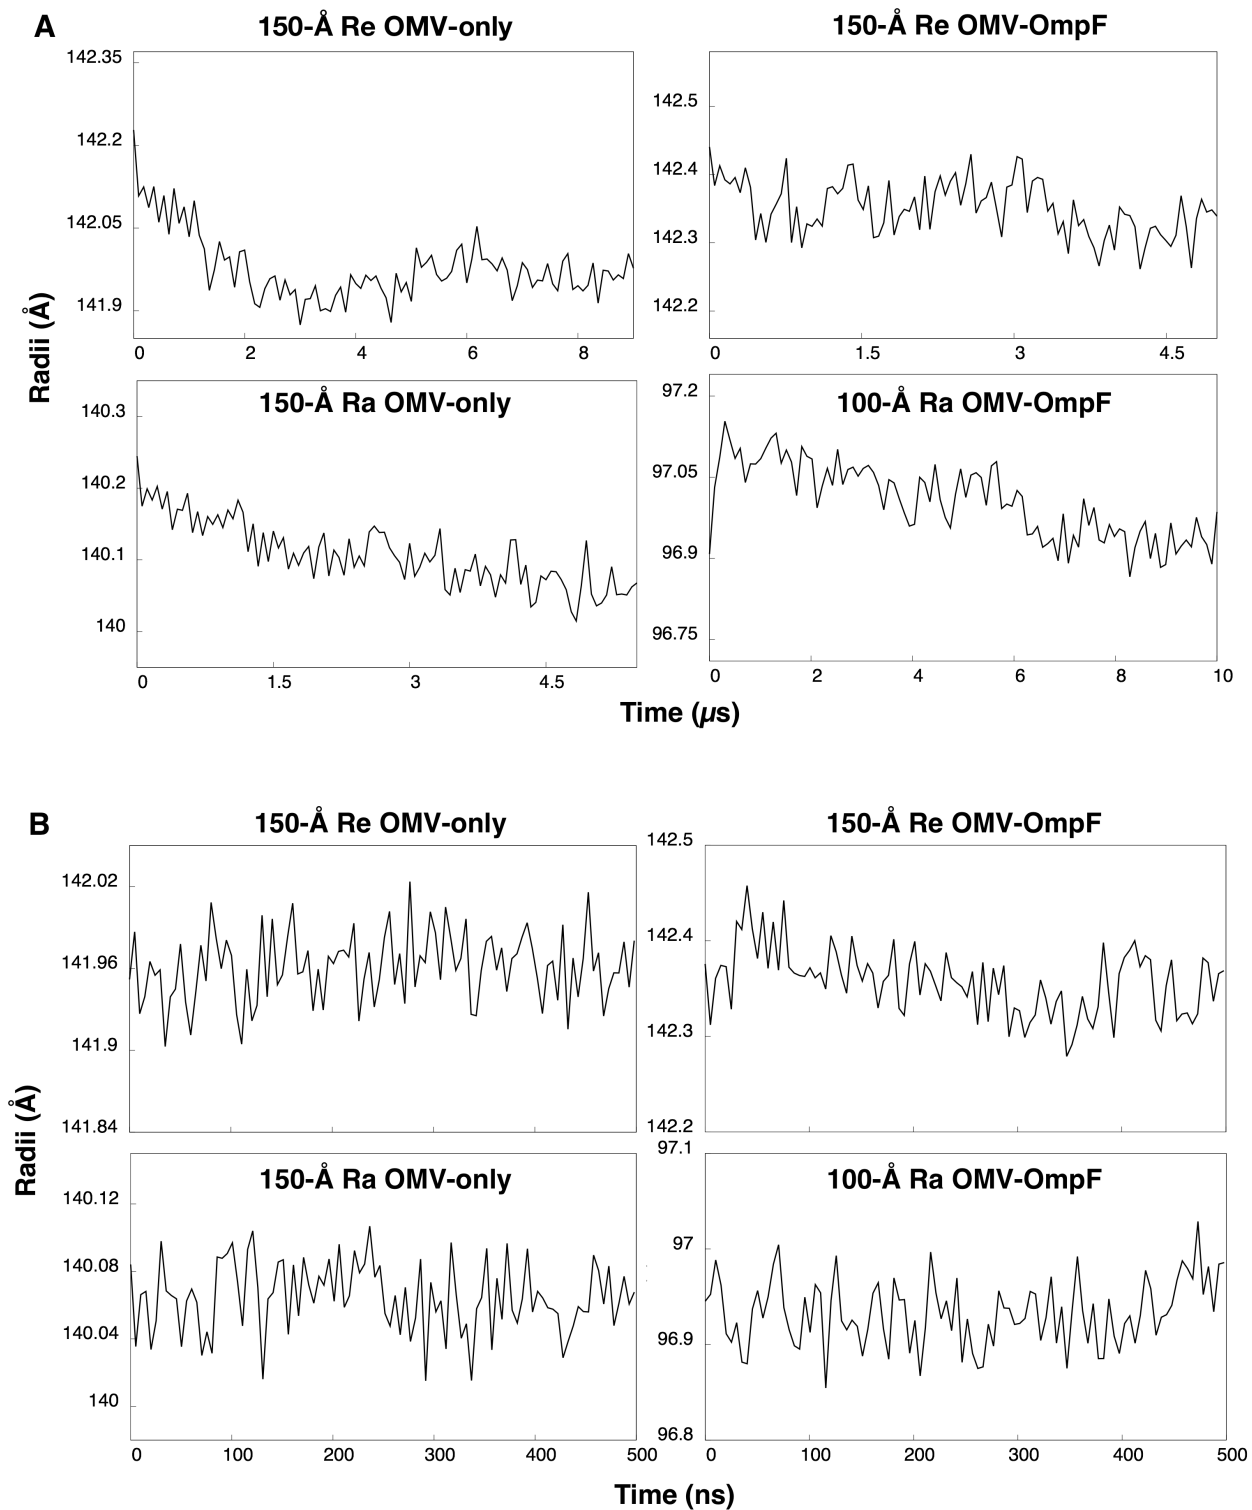

**Figure S3.** Time-series of the OMV radii calculated as the radial distance between the OMV center of and the center of mass of the encapsulating membranes for (A) the total simulation time and (B) the last 500 ns simulation time.

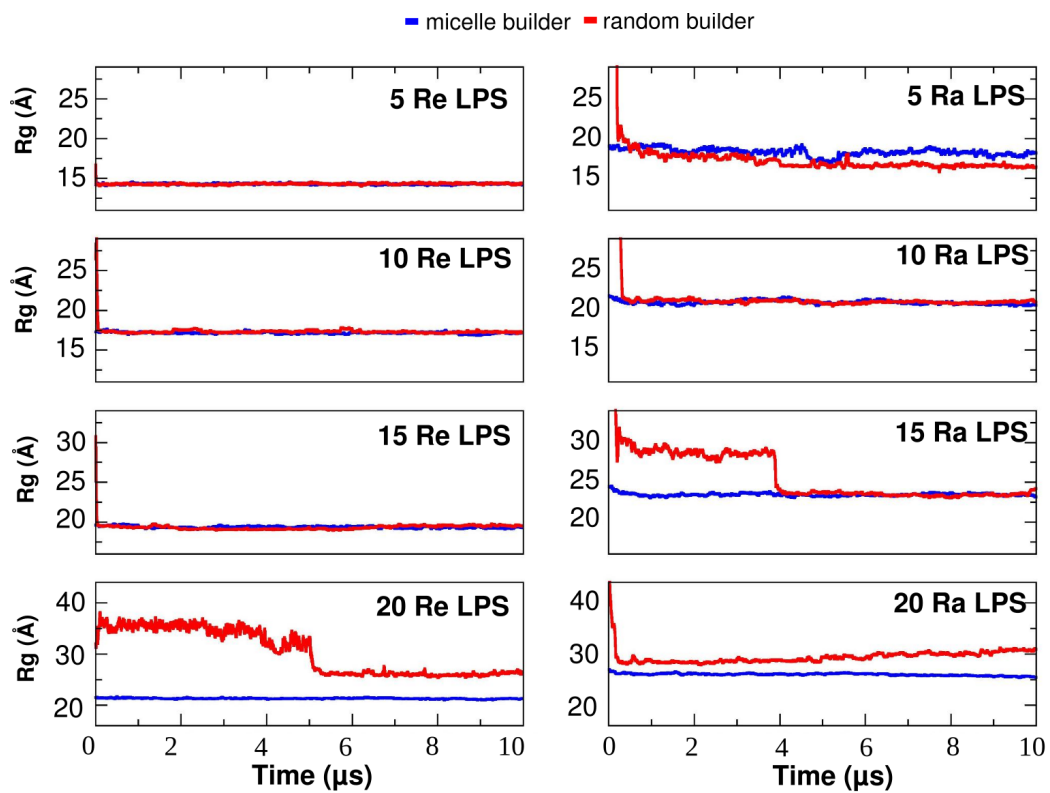

**Figure S4.** Time-series of the radius of gyration of the LPS molecules in various micelle and random systems.

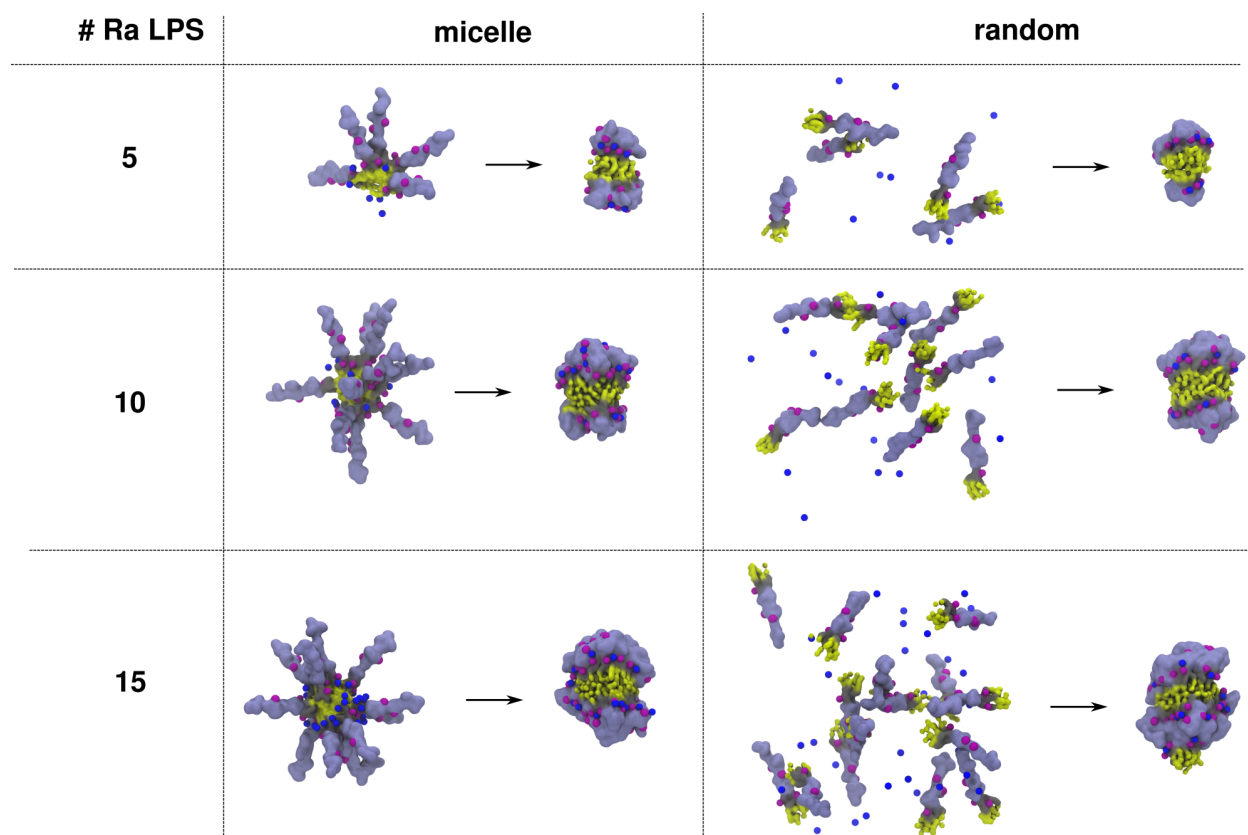

**Figure S5.** Initial structure and the last snapshot of MD simulations performed with Ra LPS micelle and random systems (5, 10, and 15 LPS molecules).

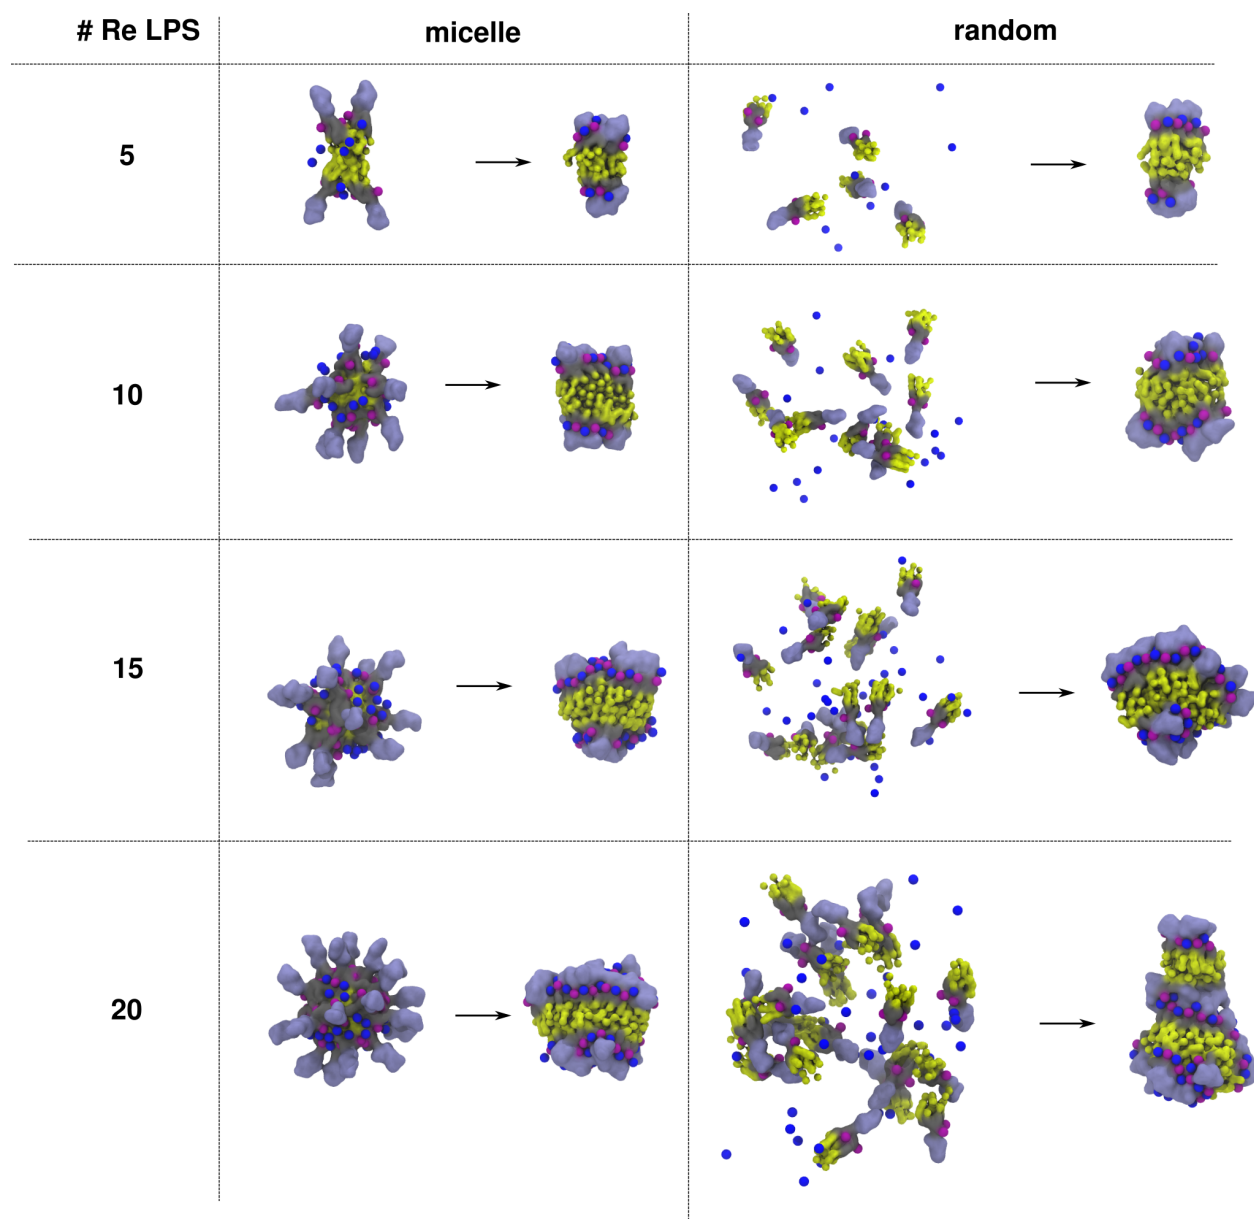

**Figure S6.** Initial structure and the last snapshot of MD simulations performed with Re LPS micelle and random systems (5, 10, 15, and 20 LPS molecules).
